# Supplementary material
Source: PubMed Central journal article supplement (PMC3800756)

Figure legends for supplemental figures:

Figure 1: Mean ( $\pm$  SEM) LH concentrations (Panel A), LH pulse amplitude (Panel B) and LH pulse frequency (Panel C) for saline (60  $\mu$ l/hr; open bars) and UFP-101 (15 nmole/hr; black bars) infused into the third ventricle of early follicular phase ewes (n = 6).

Figure 2: Mean ( $\pm$  SEM) LH concentrations (Panel A), LH pulse amplitude (Panel B) and LH pulse frequency (Panel C) for saline (60  $\mu$ l/hr; open bars) and UFP-101 (15 nmole/hr; black bars) infused into the third ventricle of mid-luteal phase ewes (n = 7). UFP-101 tended to increase frequency in this experiment, so we used twice the dose in Exp. 4.

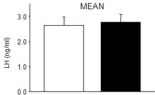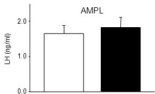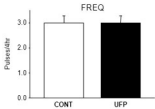

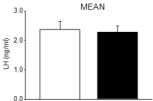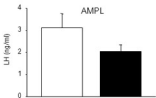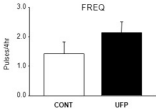

Supplement: supp_en.2013-1274_EN-13-1274suppfigs2.pdf [file supp_en.2013-1274_EN-13-1274suppfigs2.pdf]
